# Supplementary material
Source: PubMed Central journal article supplement (PMC1895125)
Supplement: blood_2004-12-4794_1.pdf [file blood_2004-12-4794_1.pdf]

Table S1. Serial CBC results from mice that developed acute leukemia

| WBC                                                         |      |      |      |                       |      |      |       |         |
|-------------------------------------------------------------|------|------|------|-----------------------|------|------|-------|---------|
| Age (month)                                                 | 6    | 7    | 8    | 9                     | 10   | 11   | 12    | 13      |
| ID                                                          |      |      |      |                       |      |      |       |         |
| 1017                                                        | 1.72 | 2.18 | ND   | 55.28*                | -    | -    | -     | -       |
| 1018                                                        | 5.8  | 6.36 | ND   | 1.00                  | 1.06 | ND   | ND    | 151.12* |
| 1897                                                        | ND   | 1.16 | 1.52 | 0.96                  | ND   | 1.14 | 4.9*  | -       |
| 1901                                                        | ND   | 2.22 | 1.94 | 13.18*                | -    | -    | -     | -       |
| White blood cell count expressed as $10^9/L$ . ND: not done |      |      |      |                       |      |      |       |         |
| *WBC at the time of leukemia diagnosis.                     |      |      |      |                       |      |      |       |         |
| Hb                                                          |      |      |      |                       |      |      |       |         |
| Age (month)                                                 | 6    | 7    | 8    | 9                     | 10   | 11   | 12    | 13      |
| ID                                                          |      |      |      |                       |      |      |       |         |
| 1017                                                        | 10.4 | 8.5  | ND   | 4.4*                  | -    | -    | -     | -       |
| 1018                                                        | 14.9 | 14.2 | ND   | 12.0                  | 10.3 | ND   | ND    | 8.7*    |
| 1897                                                        | ND   | 13.0 | 12.6 | 12.2                  | ND   | 11.7 | 6.4*  | -       |
| 1901                                                        | ND   | 13.0 | 10.8 | 8.9*                  | -    | -    | -     | -       |
| Haemoglobin expressed as g/dL. ND: not done                 |      |      |      |                       |      |      |       |         |
| *Hb at the time of leukemia diagnosis.                      |      |      |      |                       |      |      |       |         |
| MCV                                                         |      |      |      |                       |      |      |       |         |
| Age (month)                                                 | 6    | 7    | 8    | 9                     | 10   | 11   | 12    | 13      |
| ID                                                          |      |      |      |                       |      |      |       |         |
| 1017                                                        | 66.9 | 66.6 | ND   | 69.8*                 | -    | -    | -     | -       |
| 1018                                                        | 54.1 | 52.4 | ND   | 61.9                  | 65.2 | ND   | ND    | 58.0*   |
| 1897                                                        | ND   | 60.3 | 62.2 | 61.2                  | ND   | 61.9 | 71.9* | -       |
| 1901                                                        | ND   | 58.1 | 57.4 | 59.7*                 | -    | -    | -     | -       |
| Mean Cell Volume expressed as fL. ND: not done              |      |      |      |                       |      |      |       |         |
| *MCV at the time of leukemia diagnosis.                     |      |      |      |                       |      |      |       |         |
| PLT                                                         |      |      |      |                       |      |      |       |         |
| Age (month)                                                 | 6    | 7    | 8    | 9                     | 10   | 11   | 12    | 13      |
| ID                                                          |      |      |      |                       |      |      |       |         |
| 1017                                                        | 3203 | 2903 | ND   | >15000 <sup>+</sup> * | -    | -    | -     | -       |
| 1018                                                        | 840  | 915  | ND   | 1064                  | 996  | ND   | ND    | 980*    |
| 1897                                                        | ND   | 799  | 712  | 851                   | ND   | 897  | 1094* | -       |
| 1901                                                        | ND   | 1150 | 1008 | 1472*                 | -    | -    | -     | -       |
| Platelet count expressed as $10^9/L$ . ND: not done         |      |      |      |                       |      |      |       |         |
| *PLT at the time of leukemia diagnosis.                     |      |      |      |                       |      |      |       |         |
| <sup>+</sup> Estimated by manual count.                     |      |      |      |                       |      |      |       |         |
