# Supplementary material
Source: PubMed Central journal article supplement (PMC1895125)

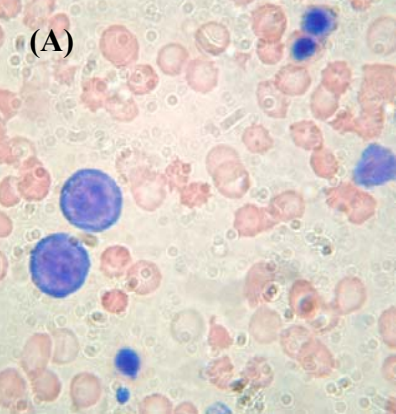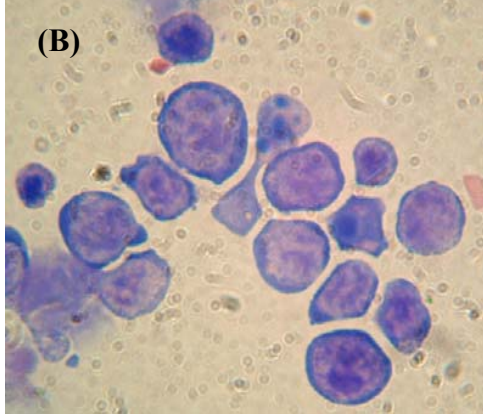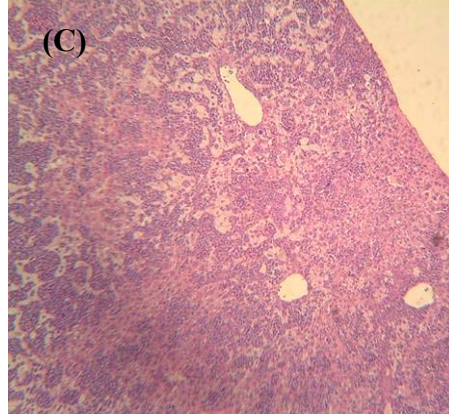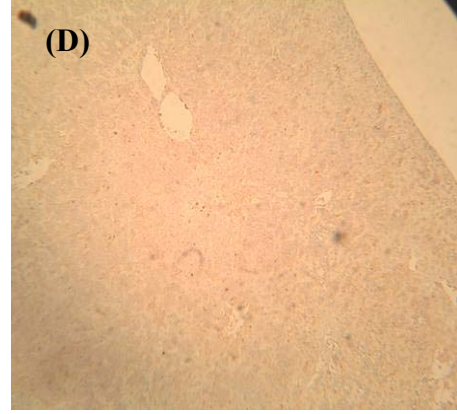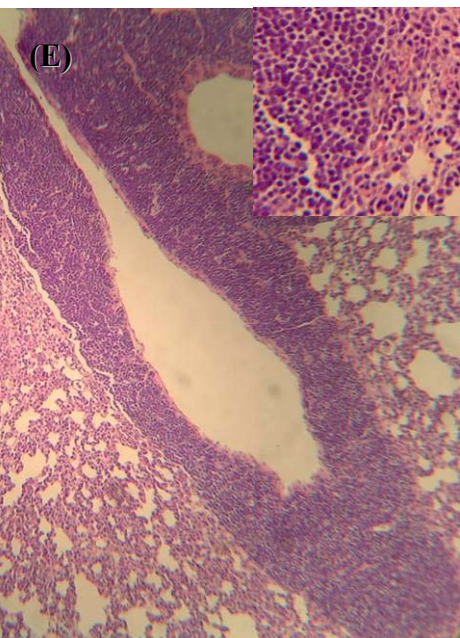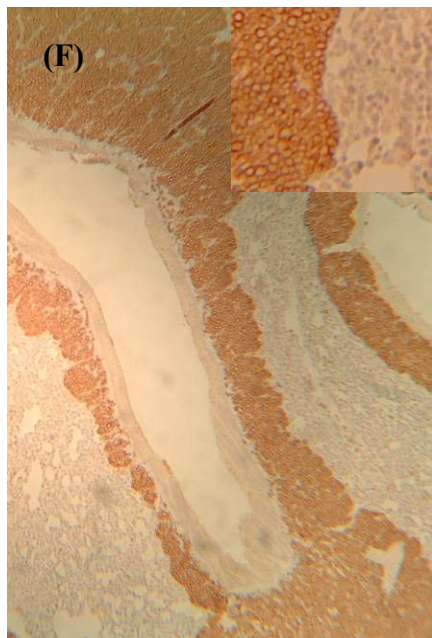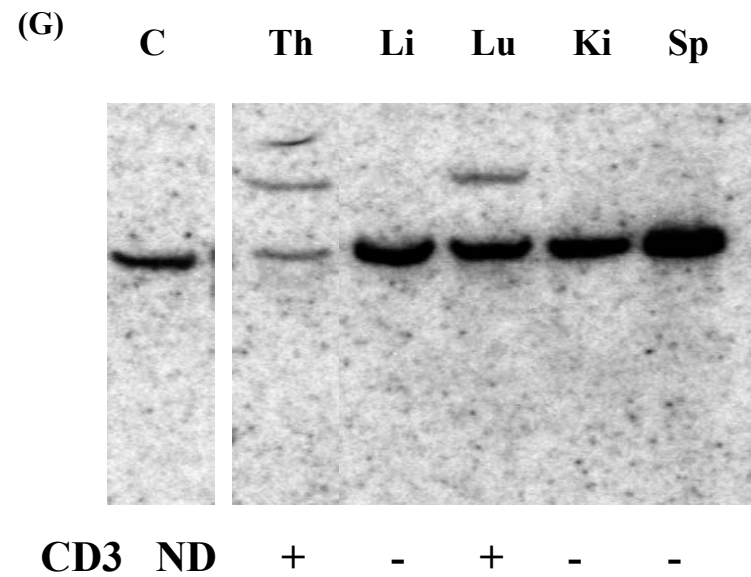

Supplement: blood_2004-12-4794_2.pdf [file blood_2004-12-4794_2.pdf]

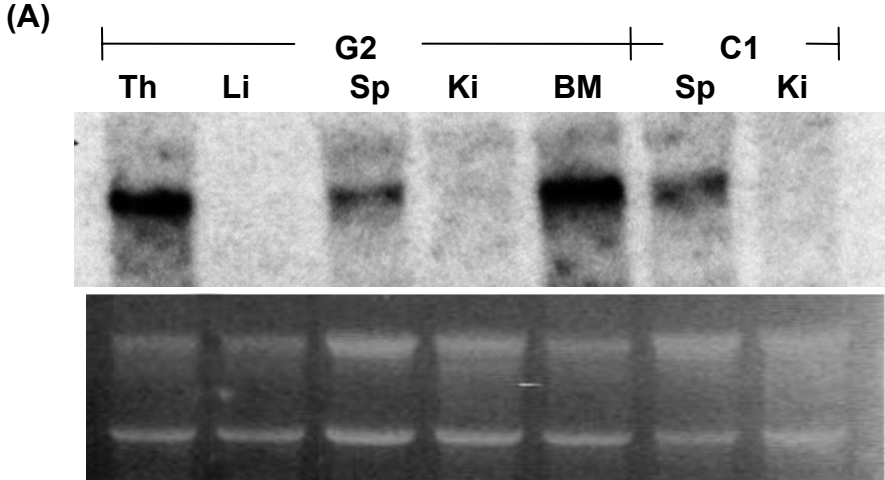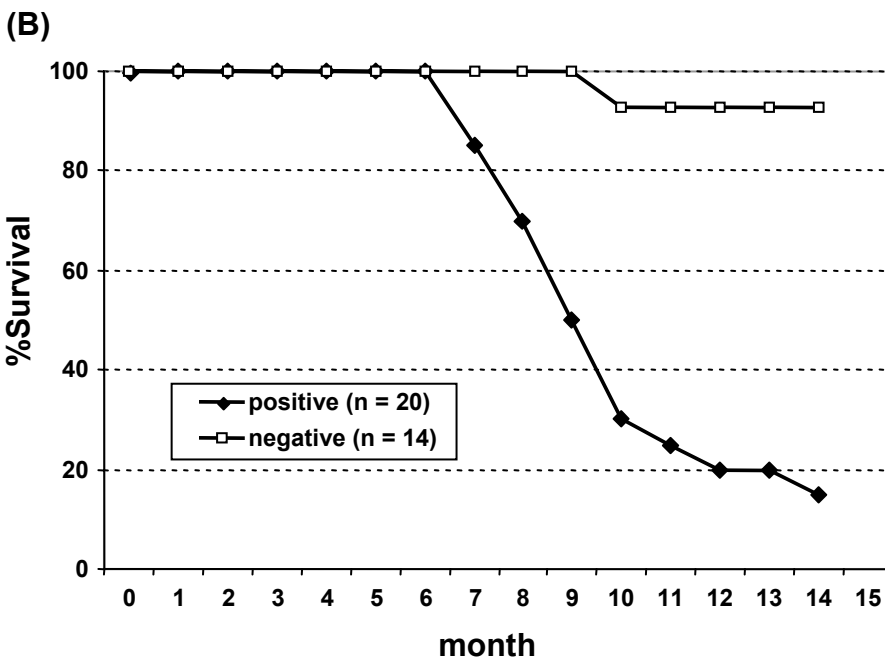

Supplement: blood_2004-12-4794_3.pdf [file blood_2004-12-4794_3.pdf]

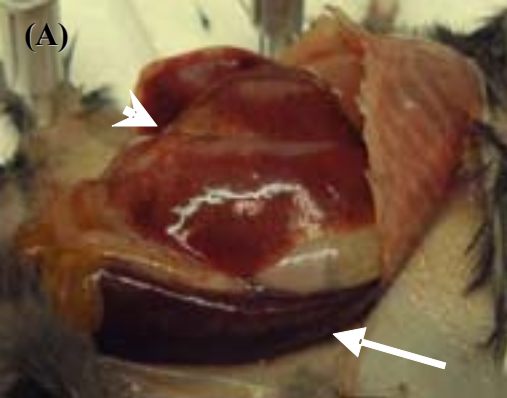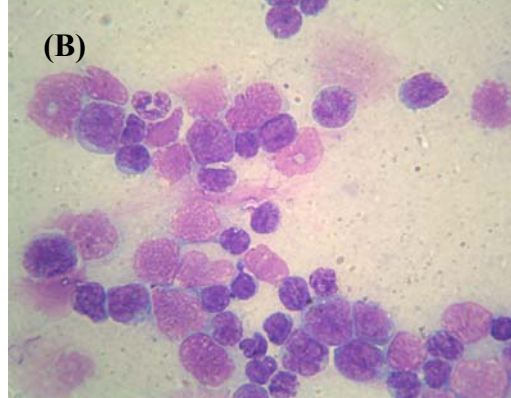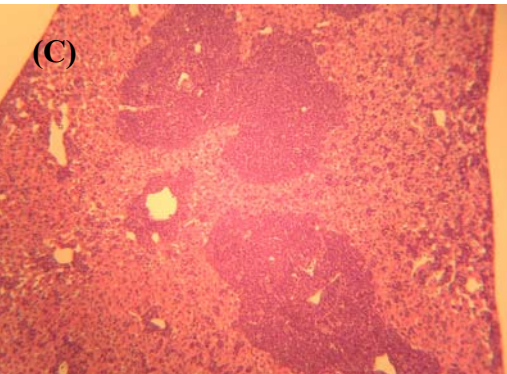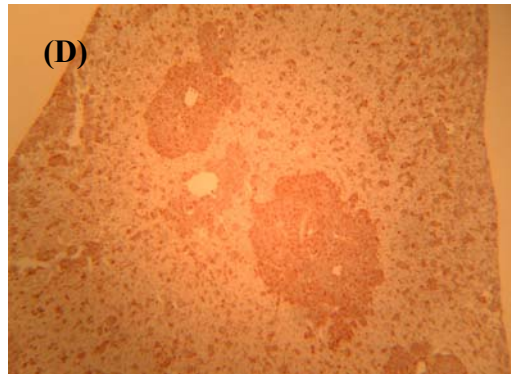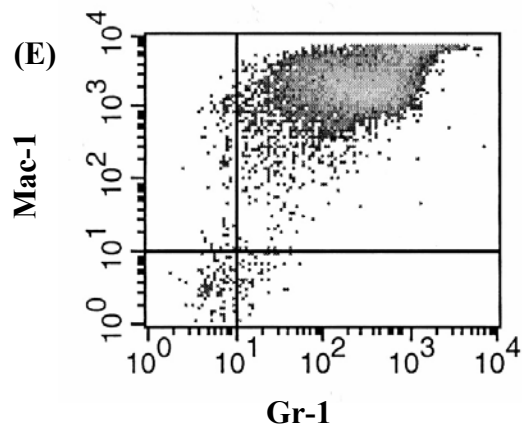

Supplement: blood_2004-12-4794_4.pdf [file blood_2004-12-4794_4.pdf]

RT

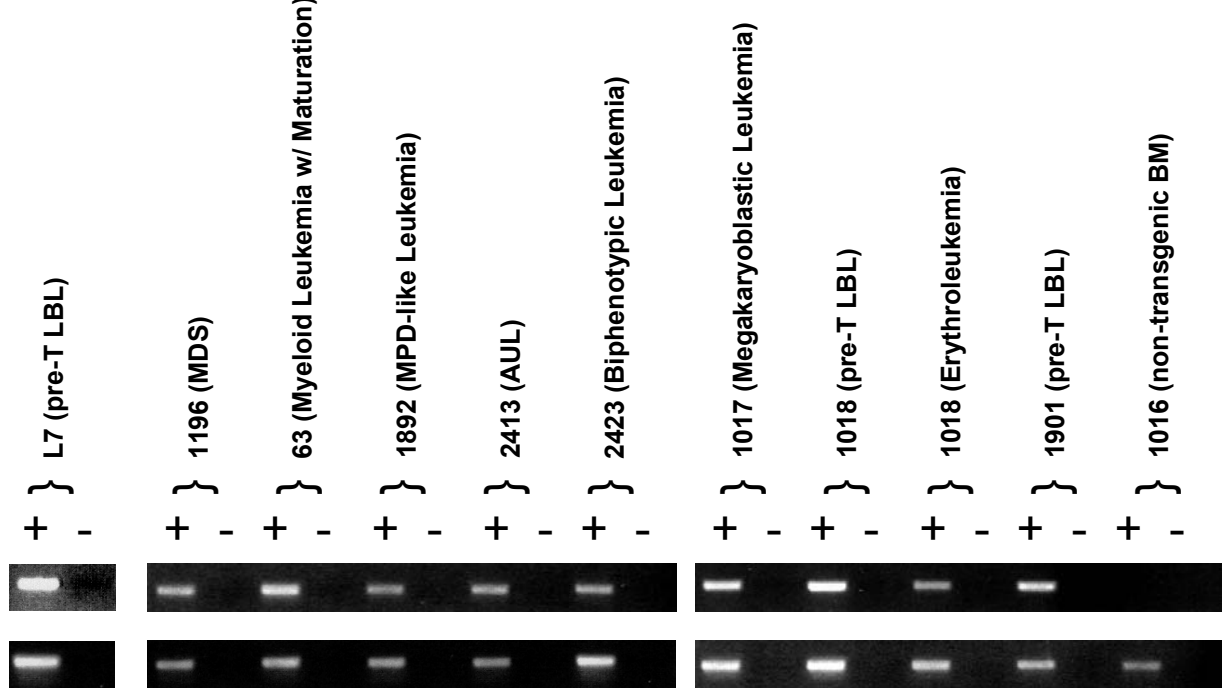

NHD13

actin

Supplement: blood_2004-12-4794_5.pdf [file blood_2004-12-4794_5.pdf]

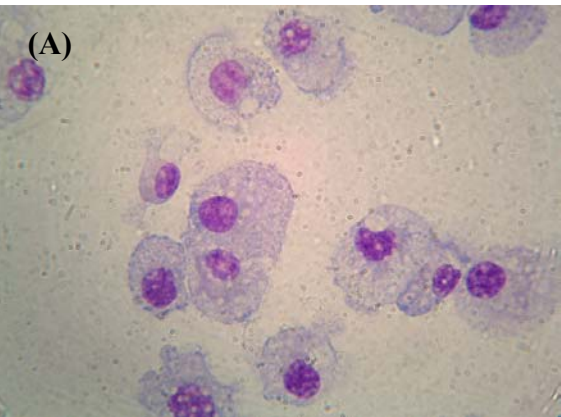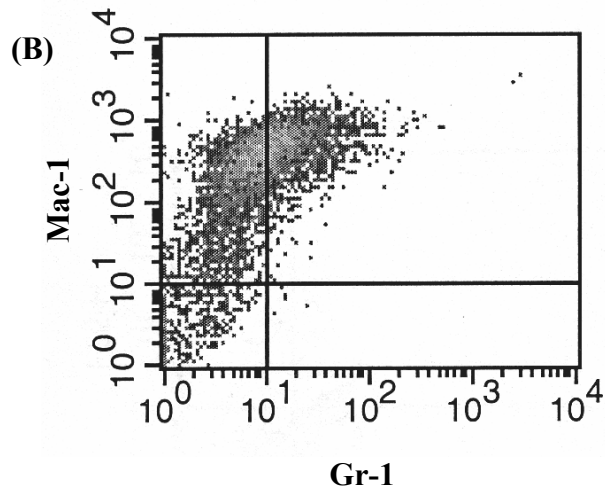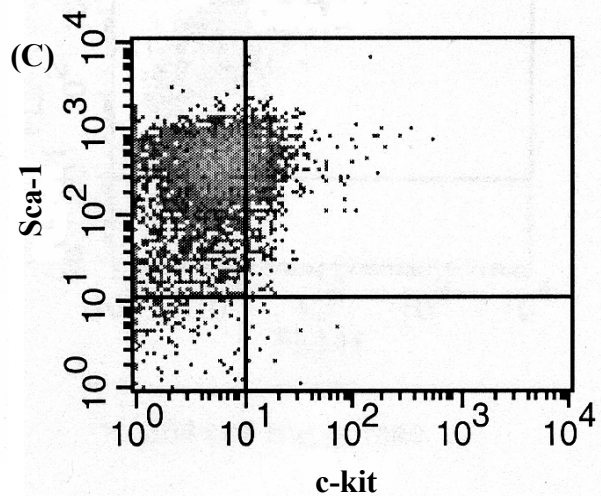

Supplement: blood_2004-12-4794_6.pdf [file blood_2004-12-4794_6.pdf]

**Non-transgenic**      **#1017**      **#1019**      **#1901**      **#2413**      **Non-transgenic**      **#254**

1 2 3      1 2 3      1 2 3      1 2 3      1 2 3      1 2 3      1 2 3

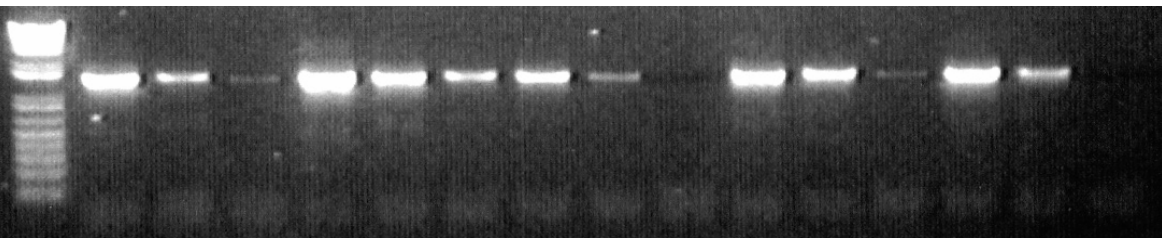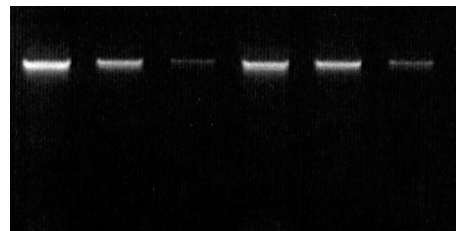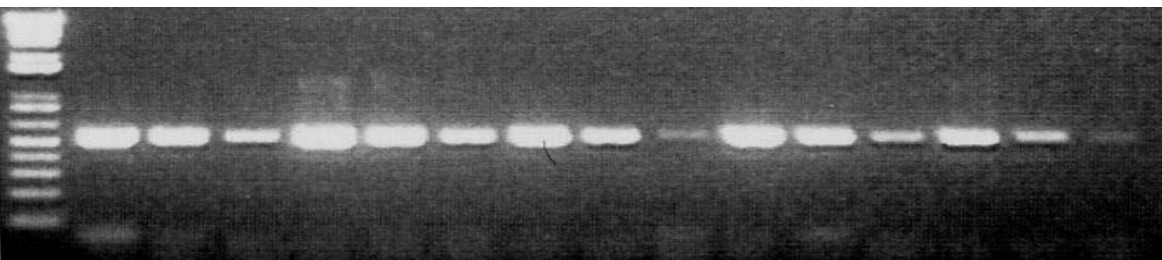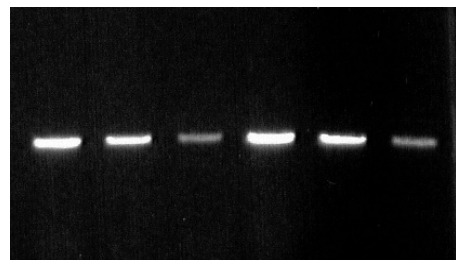

Supplement: blood_2004-12-4794_7.pdf [file blood_2004-12-4794_7.pdf]
